# Supplementary material for: Genomic characterization of carbapenem and colistin-resistant Klebsiella pneumoniae isolates from humans and dogs
Source: PubMed Central journal article supplement (PMC11148352; doi:10.3389/fvets.2024.1386496), 2024-05-21
Supplement: Image_1.pdf [file Image_1.pdf]

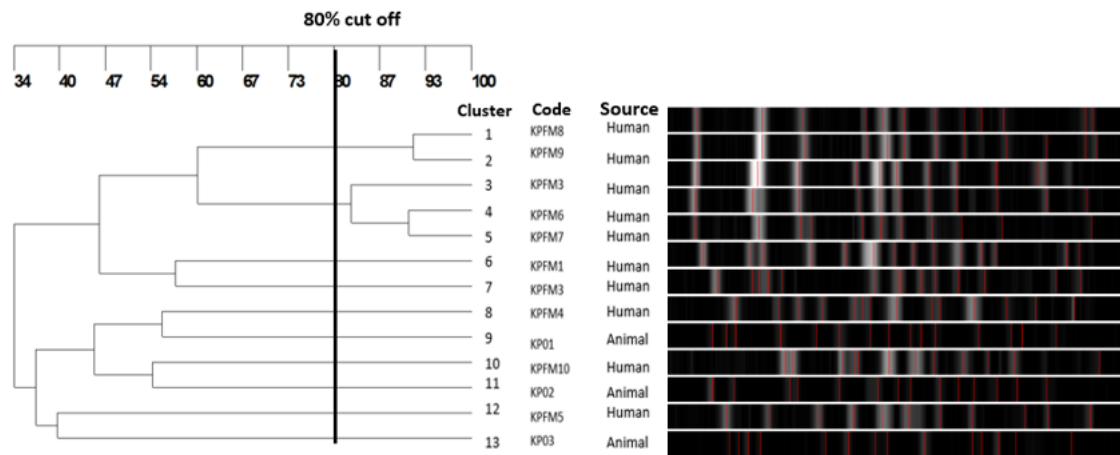

Supplementary Figure. Pulsed-field gel electrophoresis (PFGE) of Carbapenem resistant *Klebsiella pneumoniae* from canine and human isolates.
